# Supplementary material for: Buckling modes of polymer membranes restricted by metal wires
Source: Royal Society of Chemistry journal article supplement (doi:10.1039/c0sm01126f), 2011-01-01
Supplement: c0sm01126f.pdf [file c0sm01126f.pdf]

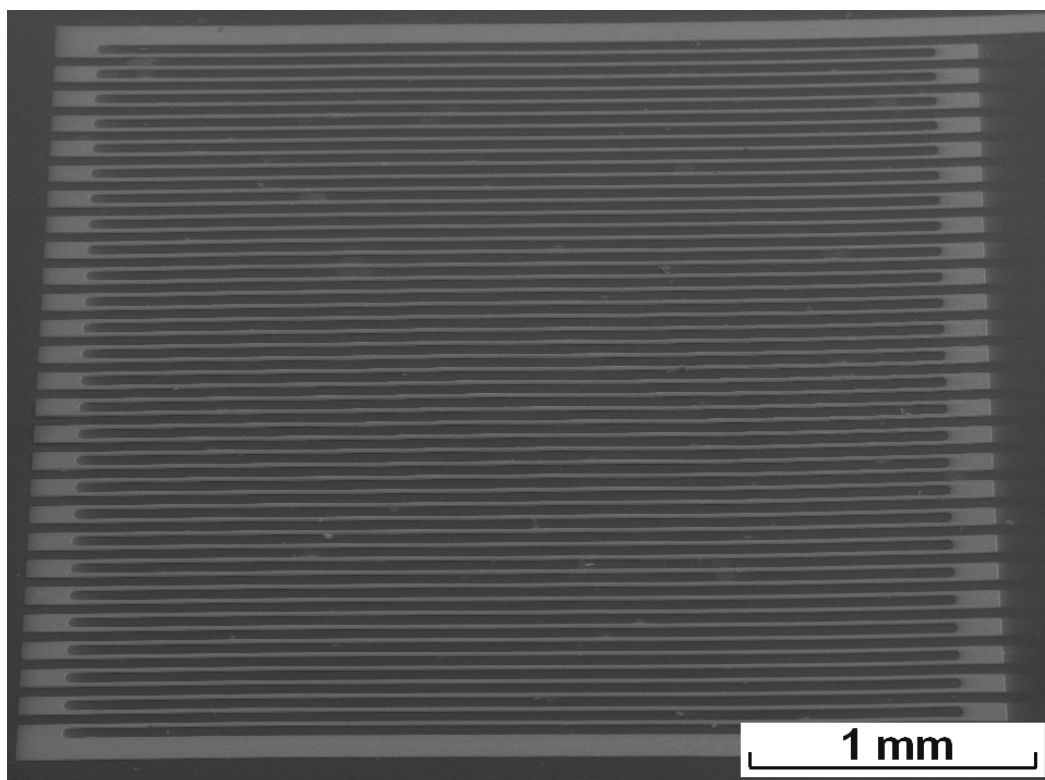

S-Fig. 1 SEM image of the sample before electrification

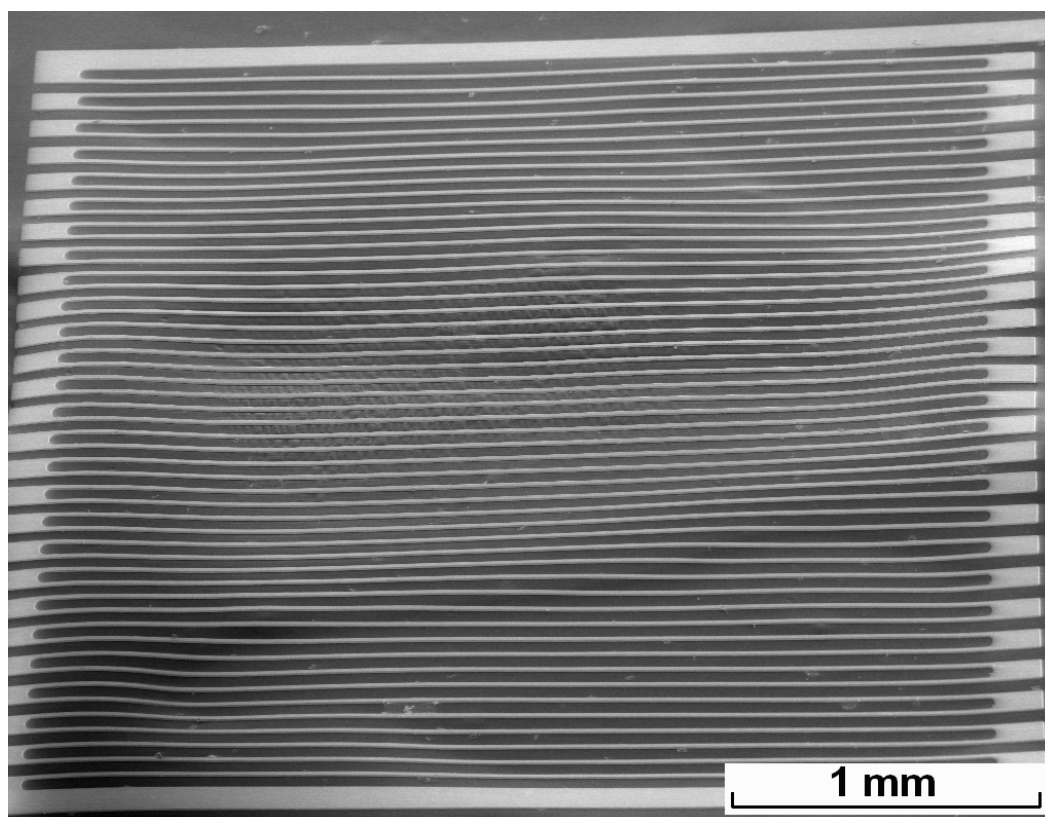

S-Fig.2 Surface morphology of the sample when varicose buckling morphology generated after bearing AC with a current density of  $2.49 \times 10^8 \text{ A/m}^2$ .

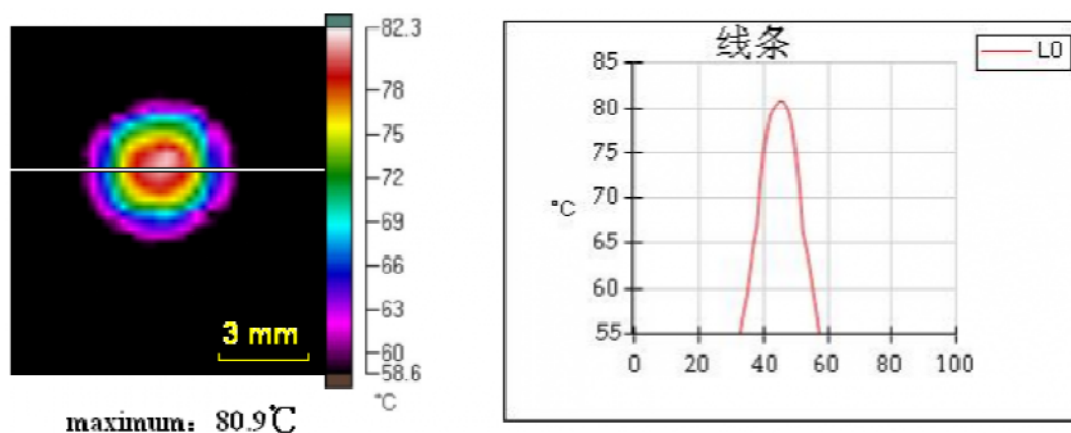

S-Fig. 3 The temperature of the sample measured by a thermal infrared imager (FLUKE Ti55FT). Here is an example: after electrification with a current density of  $2.36 \times 10^8 \text{ A/m}^2$ .

S-Table 1 Source Data of the temperature under different current density.

| Current density(*E8 A/m <sup>2</sup> ) | Temperature(□) |
|----------------------------------------|----------------|
| 0.83333333                             | 32.3           |
| 1.08333333                             | 37.3           |
| 1.36666667                             | 44.1           |
| 1.60833333                             | 51.8           |
| 1.85833333                             | 60.9           |
| 2.1                                    | 70             |
| 2.35833333                             | 80.9           |
| 2.60833333                             | 94.8           |
| 2.86666667                             | 106.3          |
| 3.11666667                             | 123.1          |
| 3.34166667                             | 133            |
| 3.55833333                             | 145.4          |
| 3.83333333                             | 166.4          |
| 4.11666667                             | 181.7          |
| 4.33333333                             | 200.4          |
| 4.625                                  | 218.6          |
| 4.85833333                             | 249.6          |
| 5.09166667                             | 257.6          |
